# Supplementary material for: Accuracy of Chest Computed Tomography in Distinguishing Cystic Pleuropulmonary Blastoma From Benign Congenital Lung Malformations in Children
Source: PubMed Central journal article supplement (PMC9247735; doi:10.1001/jamanetworkopen.2022.19814), 2022-06-30
Supplement: jamanetwopen-e2219814-s002.pdf [file jamanetwopen-e2219814-s002.pdf]

\*First name, last name, and suffix (if applicable) are required and will appear in PubMed.

| <b>*Group Name(s): Midwest Pediatric Surgery Consortium</b> |                   |                              |                  |                                               |                                          |                                                         |                                                                                            |
|-------------------------------------------------------------|-------------------|------------------------------|------------------|-----------------------------------------------|------------------------------------------|---------------------------------------------------------|--------------------------------------------------------------------------------------------|
| <b>*First Name and Middle Initial(s)</b>                    | <b>*Last Name</b> | <b>*Suffix (eg, Jr, III)</b> | Academic Degrees | Institution                                   | Location (city, state/province, country) | Role or Contribution, eg, chair, principal investigator | Group (if more than 1 Group listed in the byline and/or Subgroup (eg, Steering Committee)) |
| Jason                                                       | Fraser            |                              | MD               | Children's Mercy Hospital                     | Kansas City, MO                          | Investigator                                            |                                                                                            |
| Cynthia                                                     | Downard           |                              | MD               | Norton Children's Hospital                    | Louisville, KY                           | Investigator                                            |                                                                                            |
| Cheryl                                                      | Adams             |                              |                  | Cincinnati Children's Hospital Medical Center | Cincinnati, OH                           | Investigator                                            |                                                                                            |
| Thomas                                                      | Sato              |                              | MD               | Children's Wisconsin                          | Milwaukee, WI                            | Investigator                                            |                                                                                            |
| Daniel                                                      | von Allmen        |                              | MD               | Cincinnati Children's Hospital Medical Center | Cincinnati, OH                           | Investigator                                            |                                                                                            |
| Jonathan                                                    | Kohler            |                              | MD               | Riley Children's Hospital                     | Indianapolis, IN                         | Investigator                                            |                                                                                            |
| Daniel                                                      | Ostlie            |                              | MD               | American Family Children's Hospital           | Madison, WI                              | Investigator                                            |                                                                                            |
| Sarah                                                       | Fox               |                              |                  | C.S. Mott Children's Hospital                 | Ann Arbor, MI                            | Project Manager                                         |                                                                                            |
